# Supplementary material for: Comparative Proteomic and Metabolomic Analysis of Human Osteoblasts, Differentiated from Dental Pulp Stem Cells, Hinted Crucial Signaling Pathways Promoting Osteogenesis
Source: MDPI journal article supplement (doi:10.3390/ijms22157908), 2021-07-24

# Comparative proteomic and metabolomic analysis of human osteoblasts, differentiated from dental pulp stem cells, hinted crucial signaling pathways promoting osteogenesis

Slavomíra Nováková<sup>1\*#</sup>, Maksym Danchenko<sup>2#</sup>, Terézia Okajčeková<sup>1</sup>, Eva Baranovičová<sup>1</sup>, Andrej Kováč<sup>3</sup>, Marián Grendár<sup>1</sup>, Gábor Beke<sup>4</sup>, Janka Pálešová<sup>1</sup>, Ján Strnádel<sup>1</sup>, Mária Janíčková<sup>5</sup>, Erika Halašová<sup>1,6</sup> and Henrieta Škovierová<sup>1\*</sup>

<sup>1</sup>Biomedical Centre Martin, Jessenius Faculty of Medicine in Martin, Comenius University in Bratislava (JFM CU), Malá Hora 4C; 036 01 Martin, Slovak Republic

<sup>2</sup>Plant Science and Biodiversity Center, Slovak Academy of Sciences, Dúbravská cesta 9, 845 23 Bratislava, Slovak Republic

<sup>3</sup>Institute of Neuroimmunology, Slovak Academy of Sciences; Dúbravská cesta 9, 845 10 Bratislava, Slovak Republic

<sup>4</sup>Institute of Molecular Biology, Slovak Academy of Sciences; Dúbravská cesta 21, 845 51 Bratislava, Slovak Republic

<sup>5</sup>Department of Stomatology and Maxillofacial Surgery, University Hospital in Martin and JFM CU, Kollárova 2, 036 01 Martin, Slovak Republic

<sup>6</sup>Department of Medical Biology, Jessenius Faculty of Medicine in Martin, Comenius University in Bratislava (JFM CU), Malá Hora 4, 036 01 Martin, Slovak Republic

\*Correspondence: henrieta.skovierova@uniba.sk; Tel.: +421 43 2633 904 (H.S.)  
slavomira.novakova@uniba.sk; Tel.: +421 43 2633 904 (S.N.)

# Both authors contributed equally to this work

## Table of content

Original Images for Blots

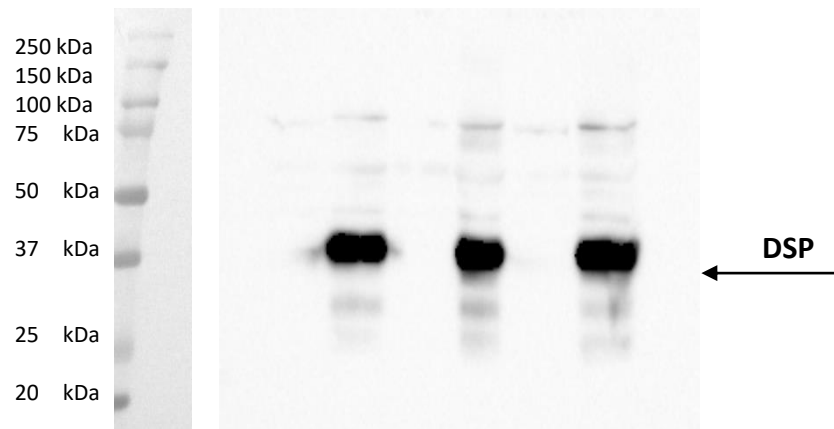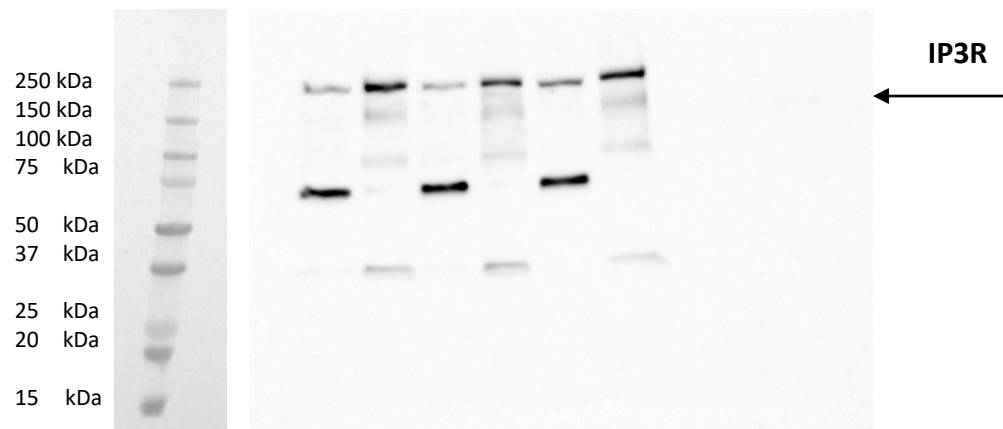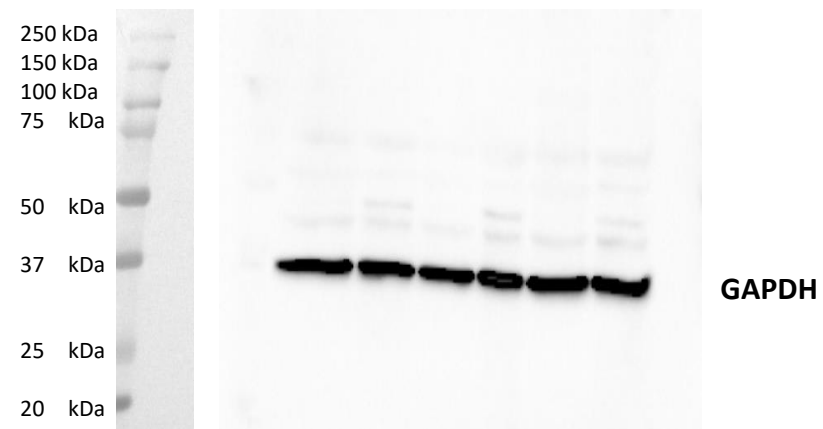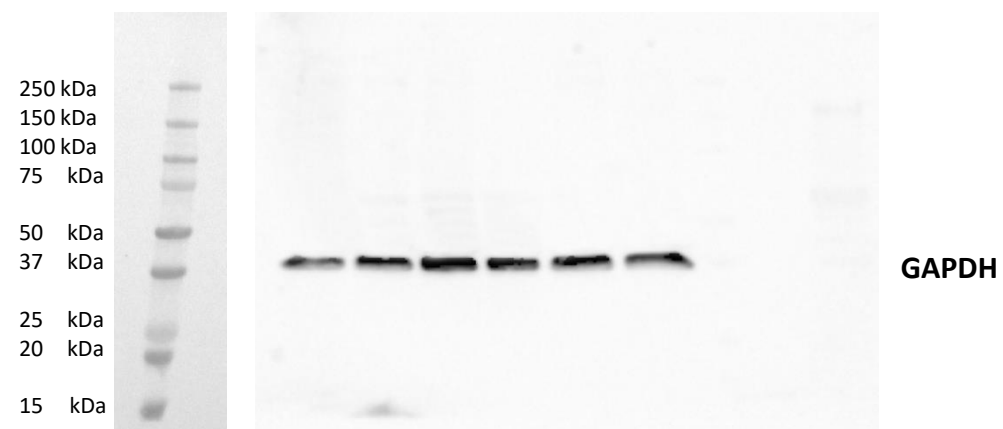

| CTRL  | DIFF | CTRL  | DIFF | CTRL  | DIFF |
|-------|------|-------|------|-------|------|
| 1. BR |      | 2. BR |      | 3. BR |      |

| CTRL  | DIFF | CTRL  | DIFF | CTRL  | DIFF |
|-------|------|-------|------|-------|------|
| 1. BR |      | 2. BR |      | 3. BR |      |

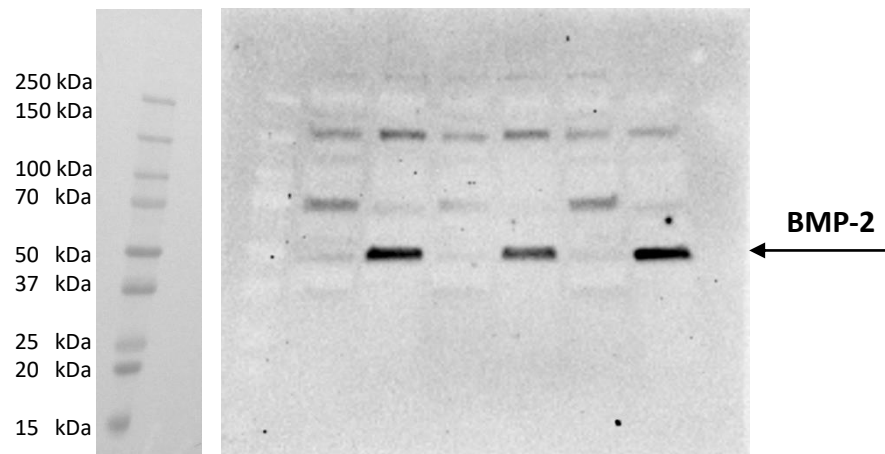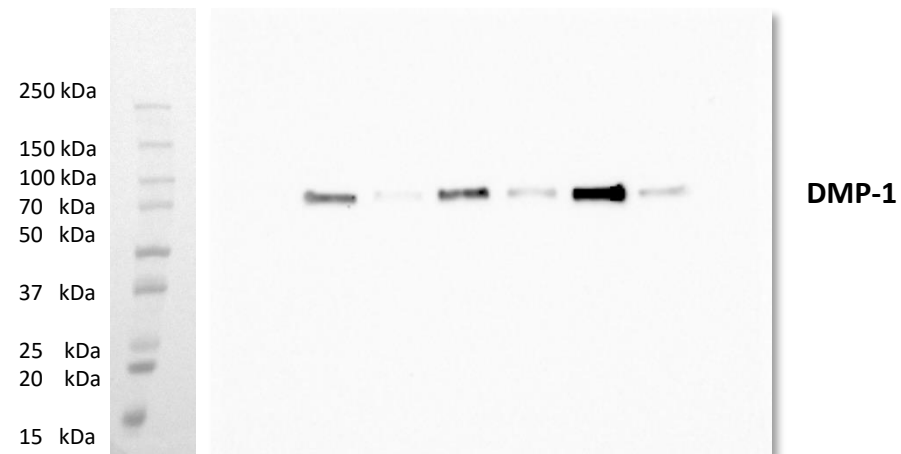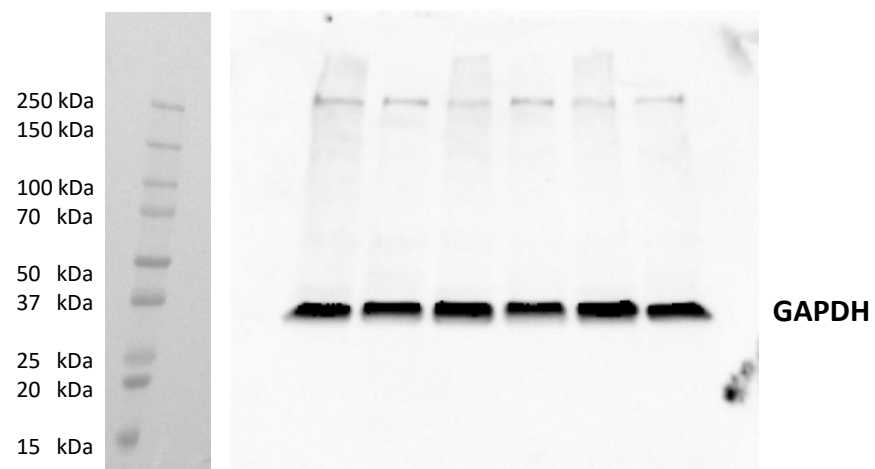

| CTRL  |  | DIFF  |  | CTRL  |  | DIFF |  | CTRL |  | DIFF |  |
|-------|--|-------|--|-------|--|------|--|------|--|------|--|
| 1. BR |  | 2. BR |  | 3. BR |  |      |  |      |  |      |  |

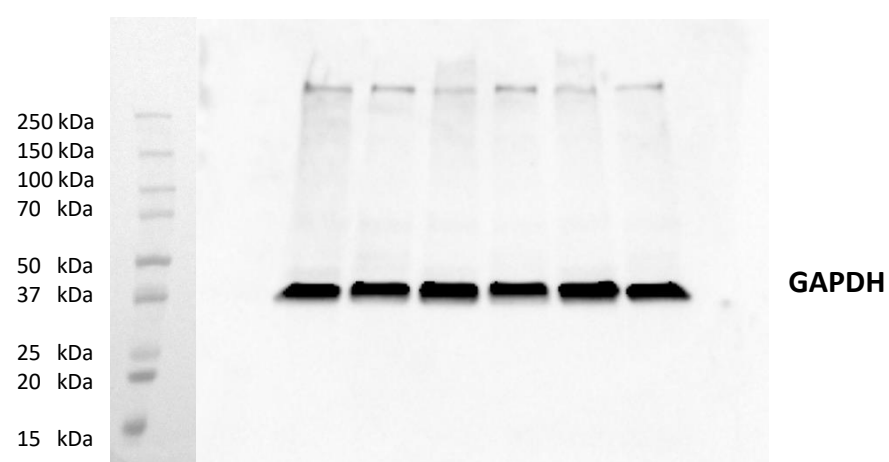

| CTRL  |  | DIFF  |  | CTRL  |  | DIFF |  | CTRL |  | DIFF |  |
|-------|--|-------|--|-------|--|------|--|------|--|------|--|
| 1. BR |  | 2. BR |  | 3. BR |  |      |  |      |  |      |  |

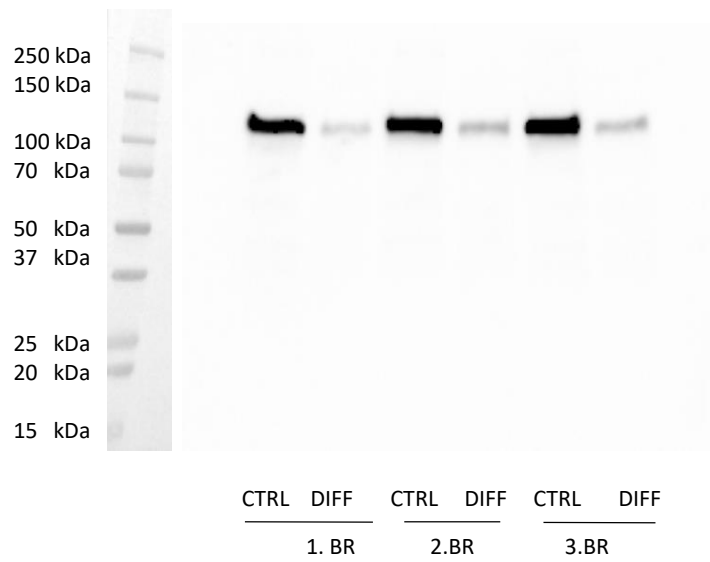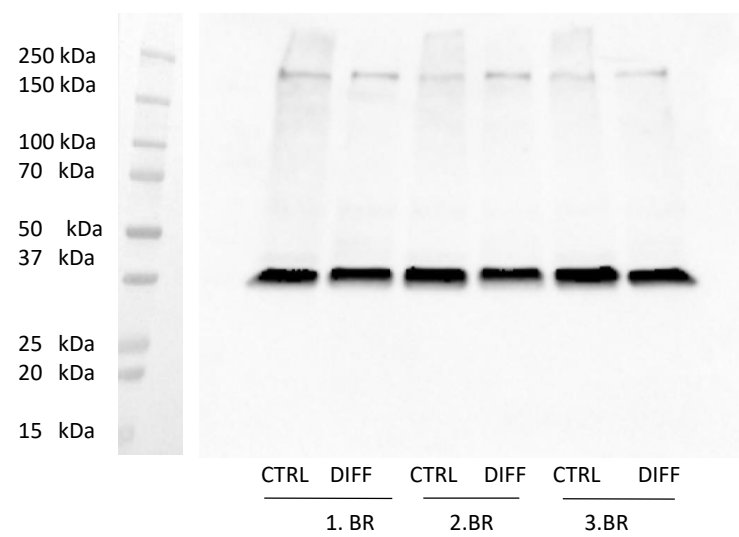

Supplement: s1 [file s1]
