# Supplementary material for: Comparative Proteomic and Metabolomic Analysis of Human Osteoblasts, Differentiated from Dental Pulp Stem Cells, Hinted Crucial Signaling Pathways Promoting Osteogenesis
Source: MDPI journal article supplement (doi:10.3390/ijms22157908), 2021-07-24
Supplement: s1 [file s1]

# Comparative proteomic and metabolomic analysis of human osteoblasts, differentiated from dental pulp stem cells, hinted crucial signaling pathways promoting osteogenesis

Slavomíra Nováková<sup>1\*#</sup>, Maksym Danchenko<sup>2#</sup>, Terézia Okajčeková<sup>1</sup>, Eva Baranovičová<sup>1</sup>, Andrej Kováč<sup>3</sup>, Marián Grendár<sup>1</sup>, Gábor Beke<sup>4</sup>, Janka Pálešová<sup>1</sup>, Ján Strnád<sup>1</sup>, Mária Janíčková<sup>5</sup>, Erika Halašová<sup>1,6</sup> and Henrieta Škovierová<sup>1\*</sup>

<sup>1</sup>Biomedical Centre Martin, Jessenius Faculty of Medicine in Martin, Comenius University in Bratislava (JFM CU), Malá Hora 4C; 036 01 Martin, Slovak Republic

<sup>2</sup>Plant Science and Biodiversity Center, Slovak Academy of Sciences, Dúbravská cesta 9, 845 23 Bratislava, Slovak Republic

<sup>3</sup>Institute of Neuroimmunology, Slovak Academy of Sciences; Dúbravská cesta 9, 845 10 Bratislava, Slovak Republic

<sup>4</sup>Institute of Molecular Biology, Slovak Academy of Sciences; Dúbravská cesta 21, 845 51 Bratislava, Slovak Republic

<sup>5</sup>Department of Stomatology and Maxillofacial Surgery, University Hospital in Martin and JFM CU, Kollárova 2, 036 01 Martin, Slovak Republic

<sup>6</sup>Department of Medical Biology, Jessenius Faculty of Medicine in Martin, Comenius University in Bratislava (JFM CU), Malá Hora 4, 036 01 Martin, Slovak Republic

\*Correspondence: henrieta.skovierova@uniba.sk; Tel.: +421 43 2633 904 (H.S.)

slavomira.novakova@uniba.sk; Tel.: +421 43 2633 904 (S.N.)

# Both authors contributed equally to this work

## Table of content

**Supplementary figure S1.** Morphological changes during 24 days in undifferentiated (control) (A) and differentiated cells (B). Magnification 100 x.

**Supplementary figure S2.** Principal component analysis: A—proteins, B—metabolites

**Supplementary figure S3.** MetaboAnalyst pathway analysis. Column chart show functional categorization of differentially abundant metabolites into metabolic pathways.

**A**

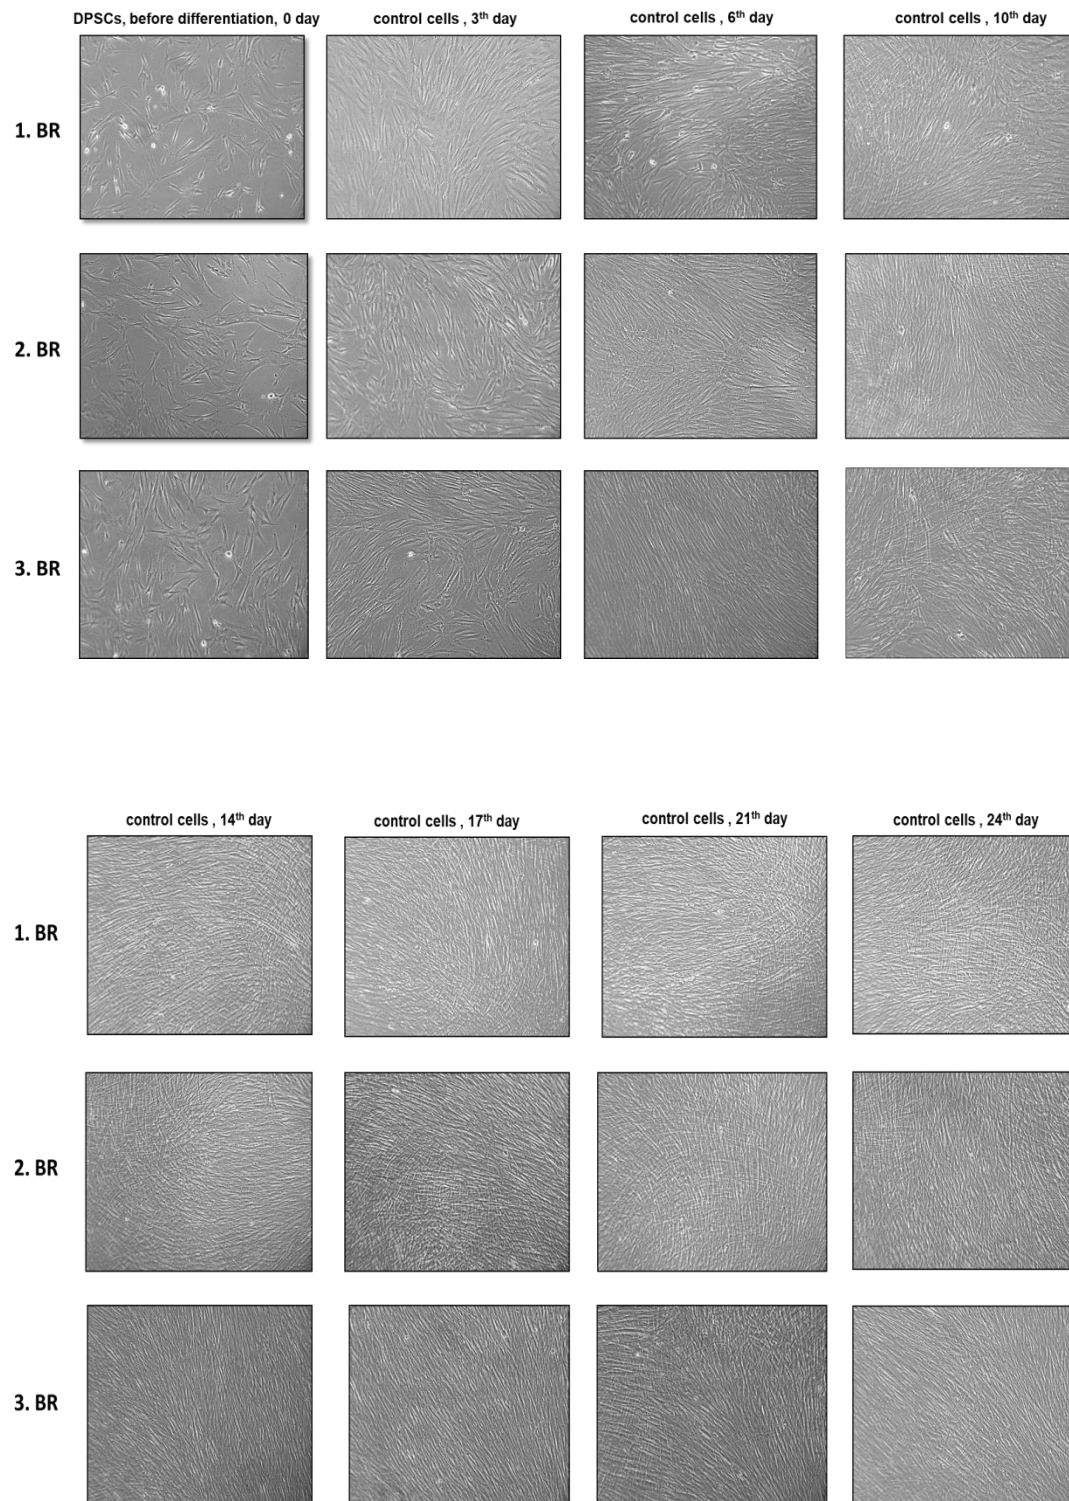

**Supplementary figure S1** Morphological changes during 24 days in undifferentiated (control) (A) and differentiated cells (B). Magnification 100 x.

**B**

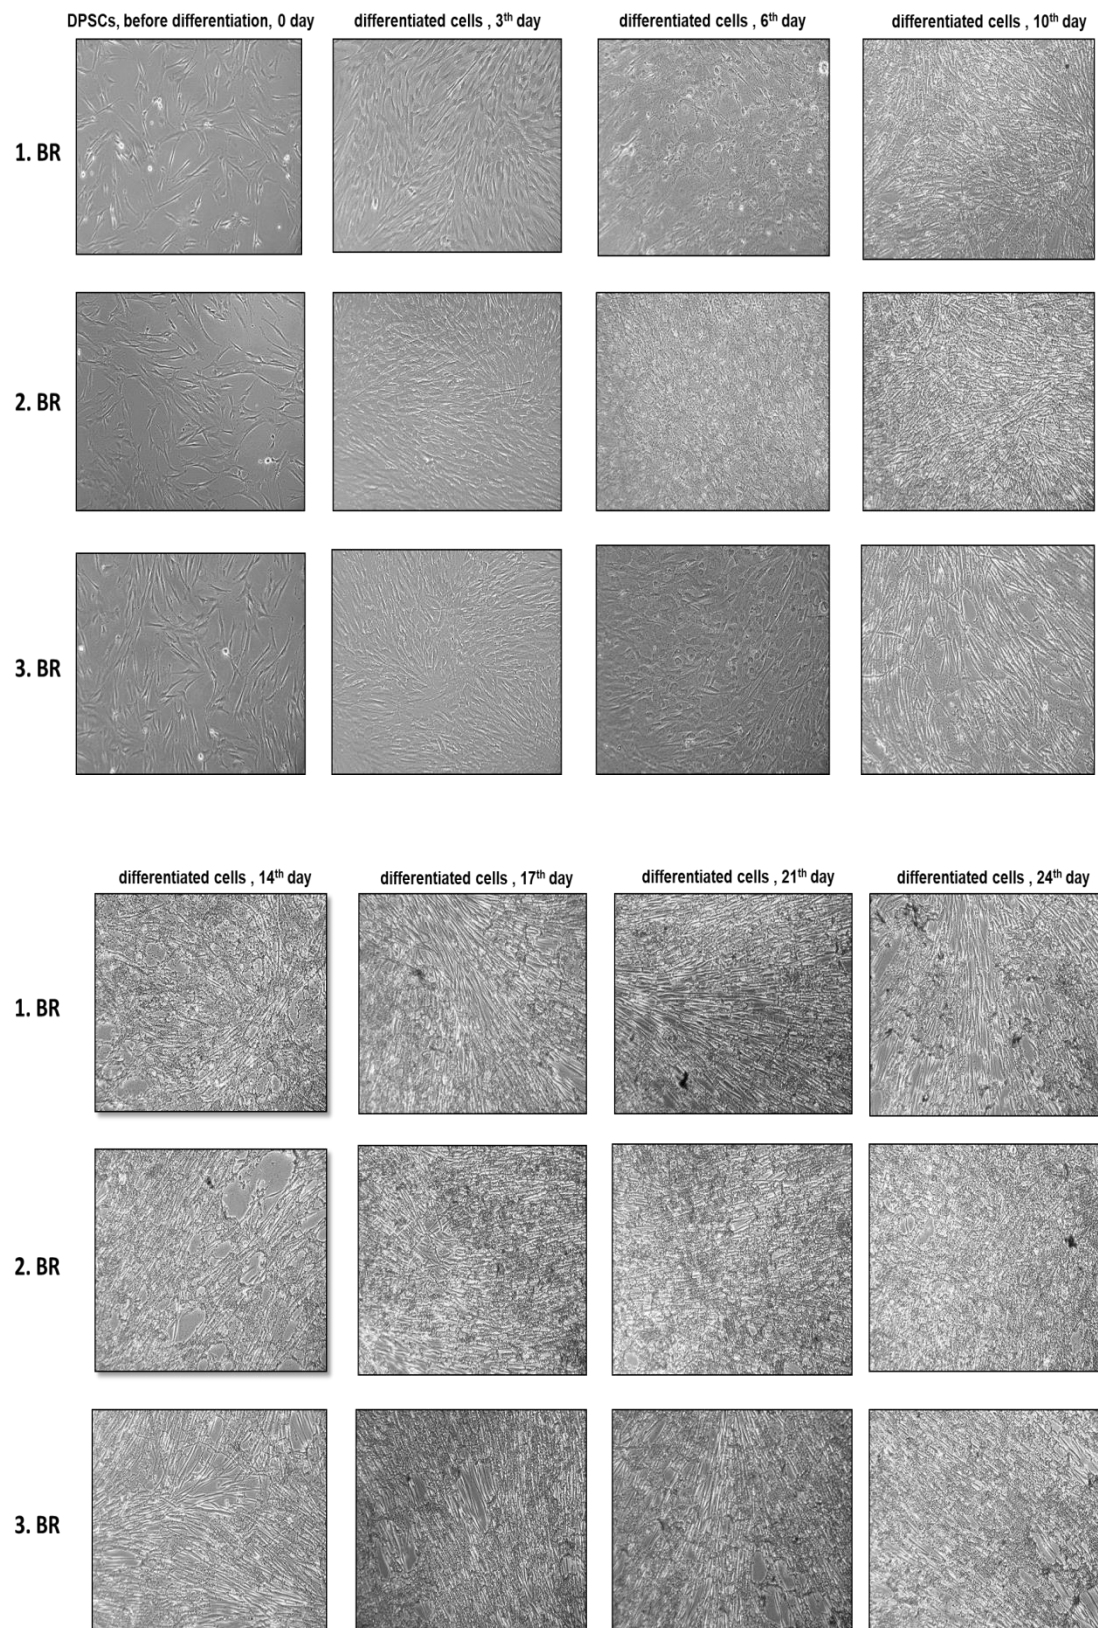

**Supplementary figure S1.** Morphological changes during 24 days in control (A) and osteodifferentiated cells (B). Magnification 100 x.

**A**

All proteins

22.3%

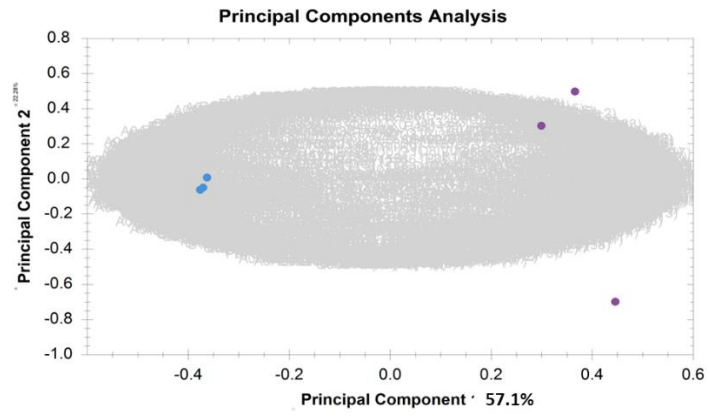

Differentially abundant

2.2%

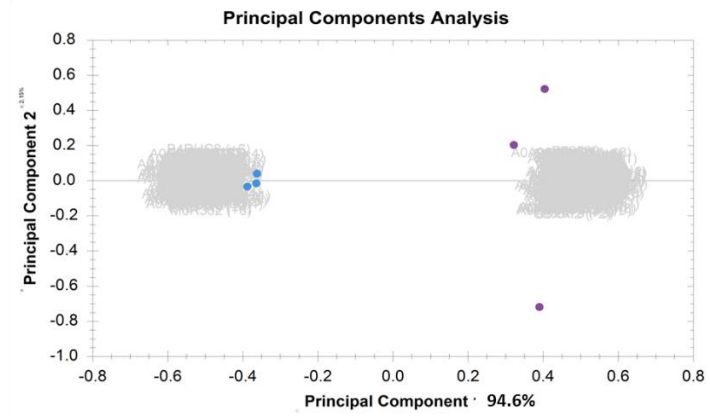

**B**

All metabolites

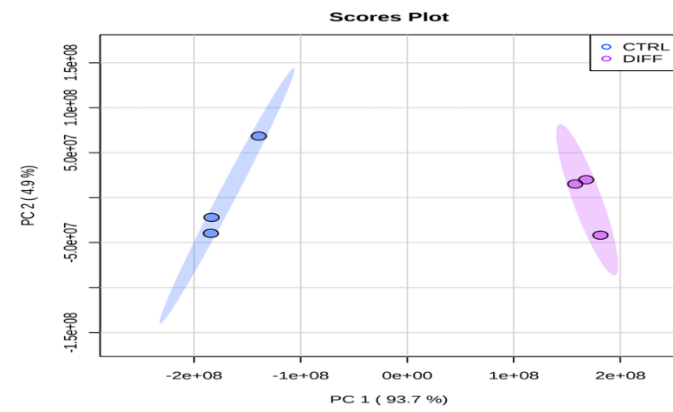

Differentially abundant

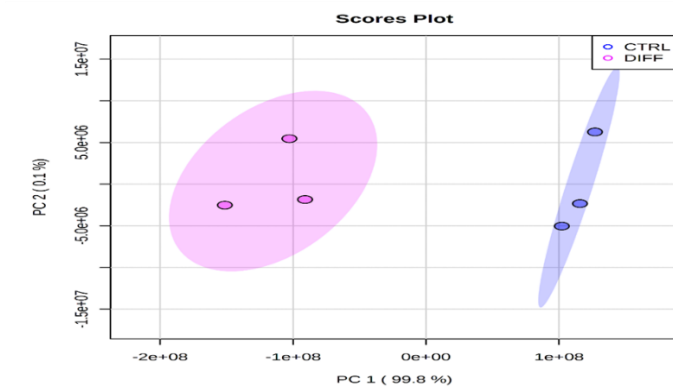

Supplementary figure S2. Principal component analysis: A—proteins, B—metabolites

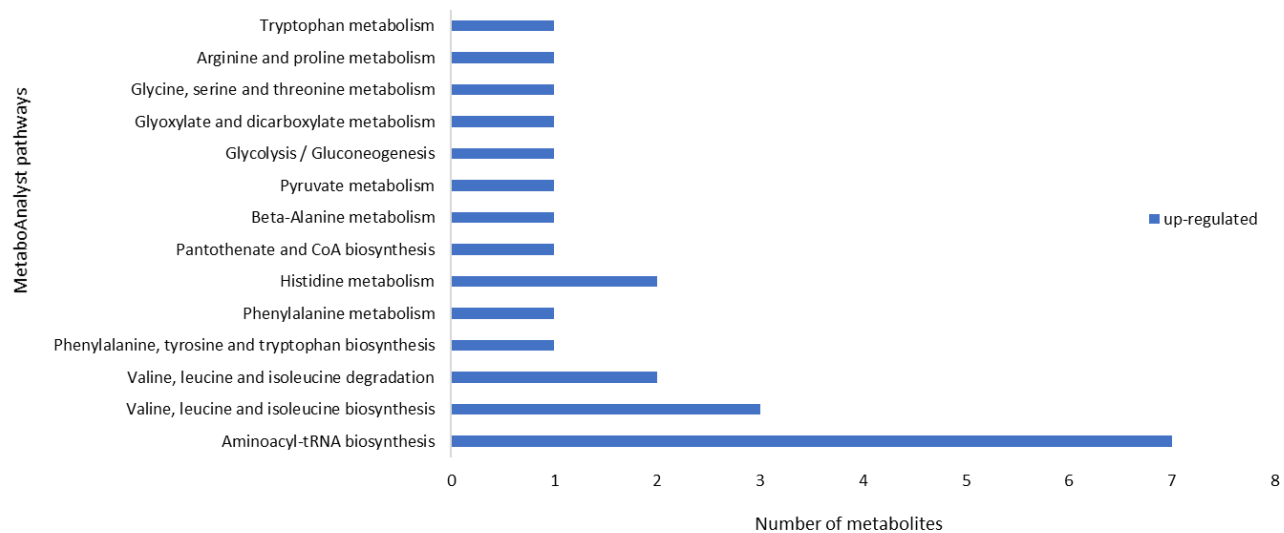

**Supplementary figure S3.** MetaboAnalyst pathway analysis. Column chart show functional categorization of differentially abundant metabolites into metabolic pathways.
